# Supplementary material for: Antibacterial Hydrogel Sheet Dressings Composed of Poly(vinyl alcohol) and Silver Nanoparticles by Electron Beam Irradiation
Source: MDPI journal article supplement (doi:10.3390/gels9020080), 2023-01-18
Supplement: s1 [file s1]

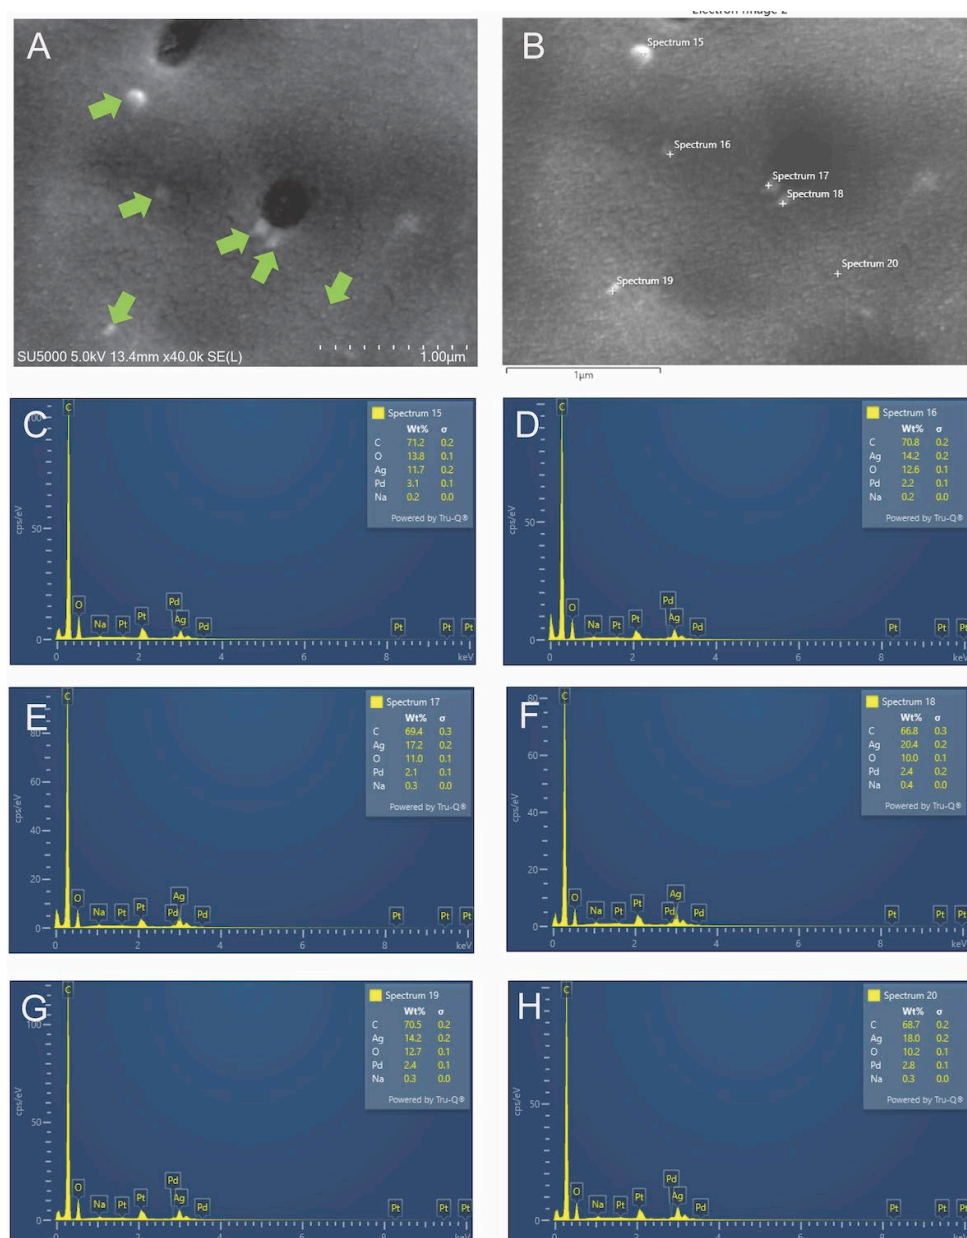

**Supplementary Figure S1.** SEM analysis of AgNP-loaded hydrogel. (A) The presence of AgNP clusters as pointed by arrows inside hydrogel. (B) The analysis of clusters in (A) using EDS. (C)–(H) The corresponding EDS spectra showing Ag  $L\alpha_1$  signals in clusters specified in (B).
